# Supplementary material for: A topochemical reaction induced the formation of Bi2S3 micro-straws from a Bi-MOF for an ultra-long Zn storage life
Source: Royal Society of Chemistry journal article supplement (doi:10.1039/d3dt02448b), 2023-01-01
Supplement: d3dt02448b1.pdf [file d3dt02448b1.pdf]

## Supporting Information

### **Topochemical Reaction Induced the formation of Bi<sub>2</sub>S<sub>3</sub> Micro-straws from Bi-MOF for Ultra-long Zn Storage Life**

Lei Gou,<sup>\*a</sup> Kai Liang,<sup>a</sup> Wen-Yan Wang,<sup>a</sup> Ya-Ting Lei,<sup>a</sup> Shou-Lin Xie,<sup>a</sup> Ding-Kai Wei,<sup>a</sup> Dong-

Lin Li<sup>a</sup> and Xiao-Yong Fan<sup>\*a</sup>

<sup>a</sup> Institute of Energy Materials and Electronic Device, School of Materials Science and Engineering, Chang'an University, Xi'an 710061, China

\*Corresponding authors: [leigou@chd.edu.cn](mailto:leigou@chd.edu.cn) (L Gou); [xyfan@chd.edu.cn](mailto:xyfan@chd.edu.cn) (X.Y. Fan)

### **Synthesis of the Bi<sub>2</sub>S<sub>3</sub>-TF**

Bi<sub>2</sub>S<sub>3</sub>-TF was also chemically synthesized by a solvothermal method. Bi(NO<sub>3</sub>)<sub>3</sub>·5H<sub>2</sub>O (50 mg) and thiourea (CH<sub>4</sub>N<sub>2</sub>S, 100 mg) were mixed in a mass ratio of 1:2 and added into a 20 mL absolute ethanol solution, which was sonicated for 30 min, and then stirred for 30 min. The mixture was transferred into a PTFE-lined stainless steel autoclave and kept at 160 °C for 6 h before cooling down to room temperature. The resulting product was dried in air overnight after filtering, washed thoroughly with ethanol and water, and labeled as Bi<sub>2</sub>S<sub>3</sub>-TF.

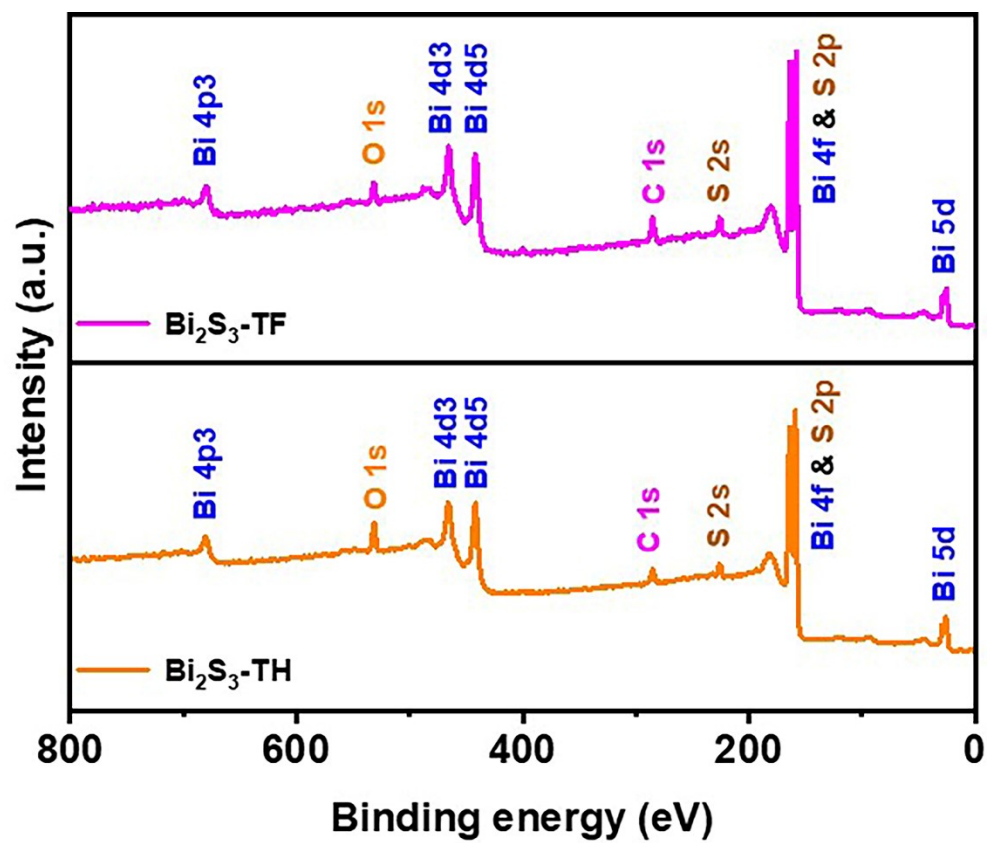

**Figure S1.** High-resolution XPS fine spectra of  $\text{Bi}_2\text{S}_3\text{-TH}$  and  $\text{Bi}_2\text{S}_3\text{-TF}$

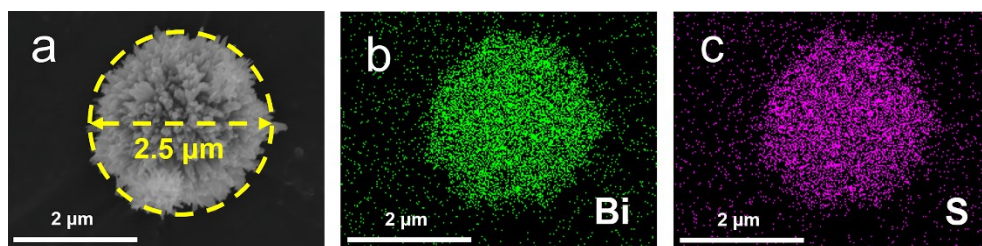

**Figure S2.** SEM images of the  $\text{Bi}_2\text{S}_3$ -TF products and corresponding EDS analysis of Bi and S their elemental mapping (b and c).

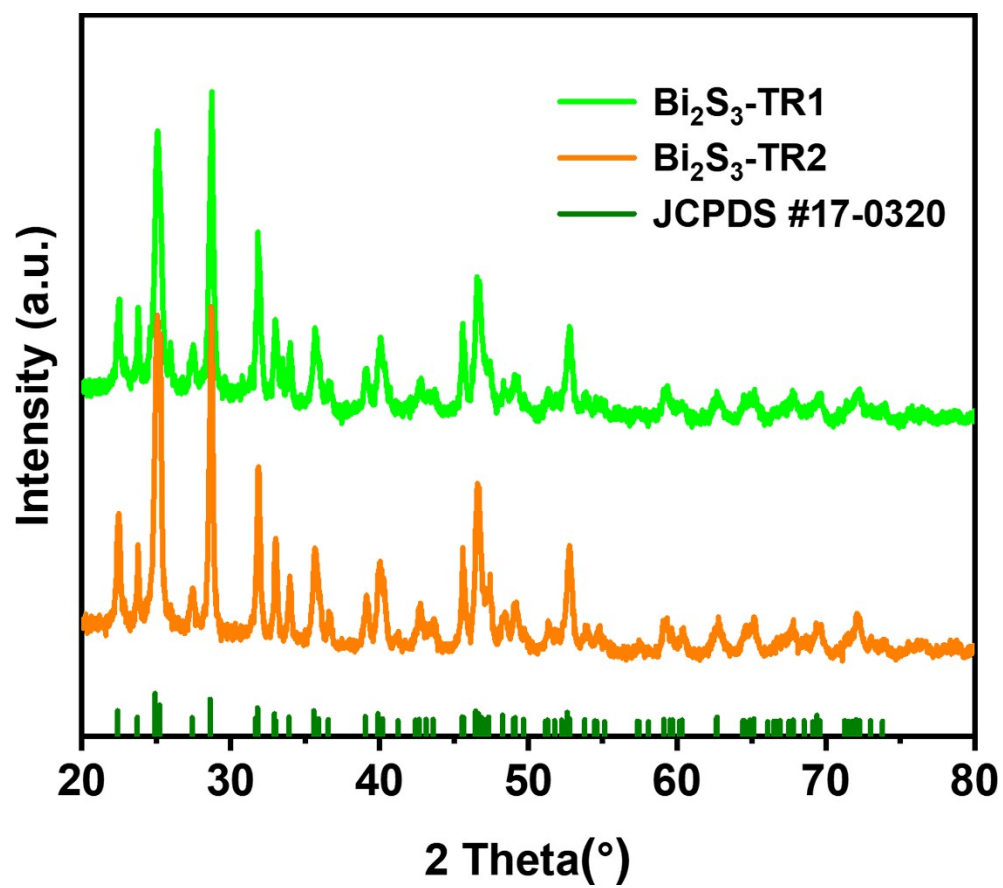

**Figure S3.** XRD patterns of the Bi<sub>2</sub>S<sub>3</sub>-TR1 and Bi<sub>2</sub>S<sub>3</sub>-TR2

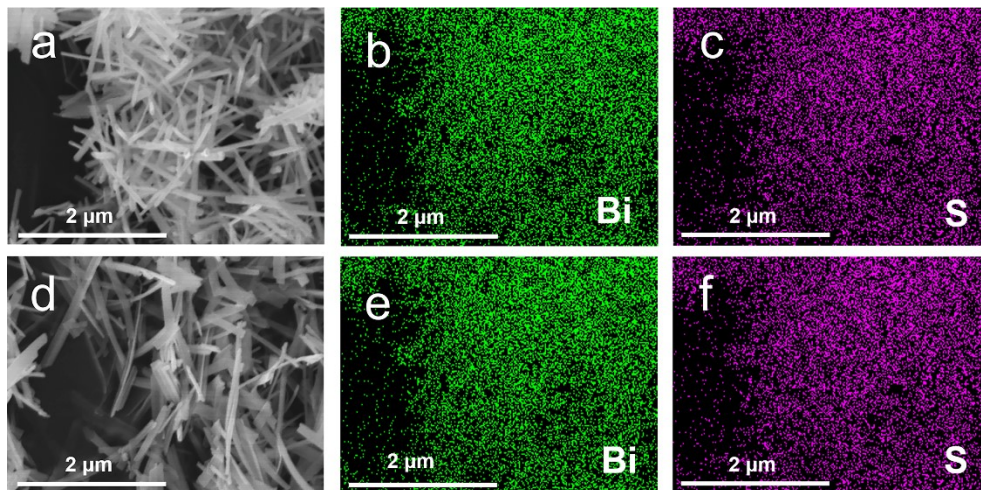

**Figure S4.** (a) SEM images of the Bi<sub>2</sub>S<sub>3</sub>-TR1 products and corresponding EDS analysis of Bi and S their elemental mapping (b and c), (d) SEM images of the Bi<sub>2</sub>S<sub>3</sub>-TR2 products and corresponding EDS analysis of Bi and S their elemental mapping (e and f).

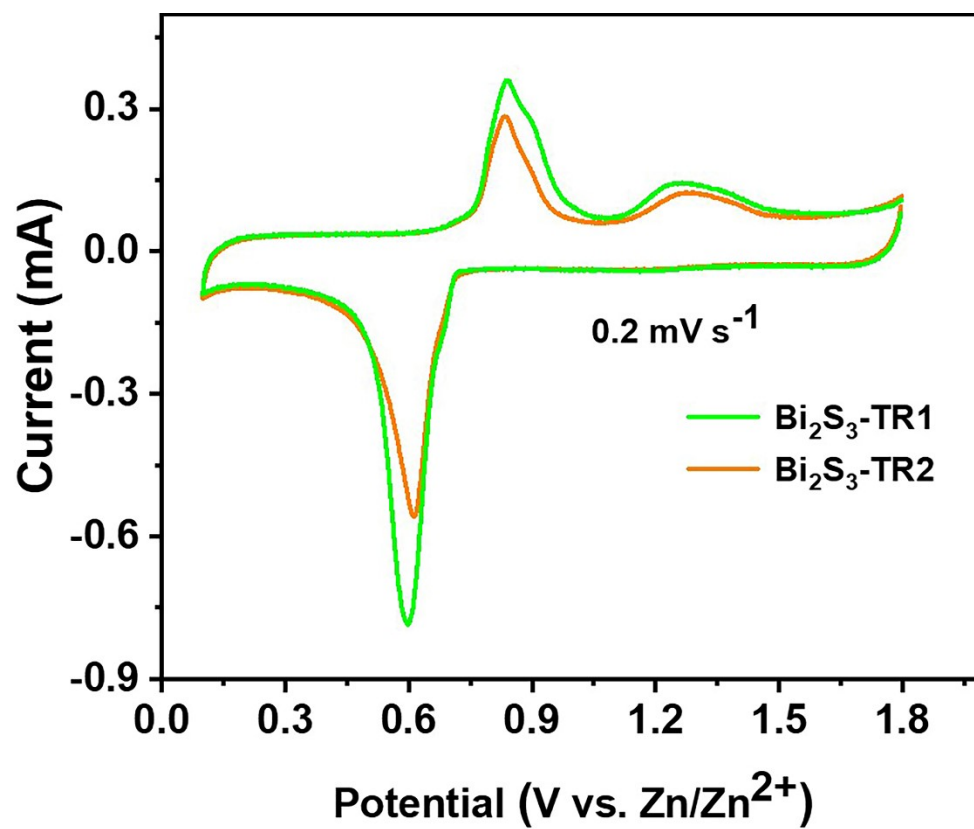

**Figure S5.** CV profiles of the Bi<sub>2</sub>S<sub>3</sub>-TR1 and Bi<sub>2</sub>S<sub>3</sub>-TR2 electrodes at 0.2 mVs<sup>-1</sup> in an aqueous electrolyte of 3M ZnSO<sub>4</sub>.

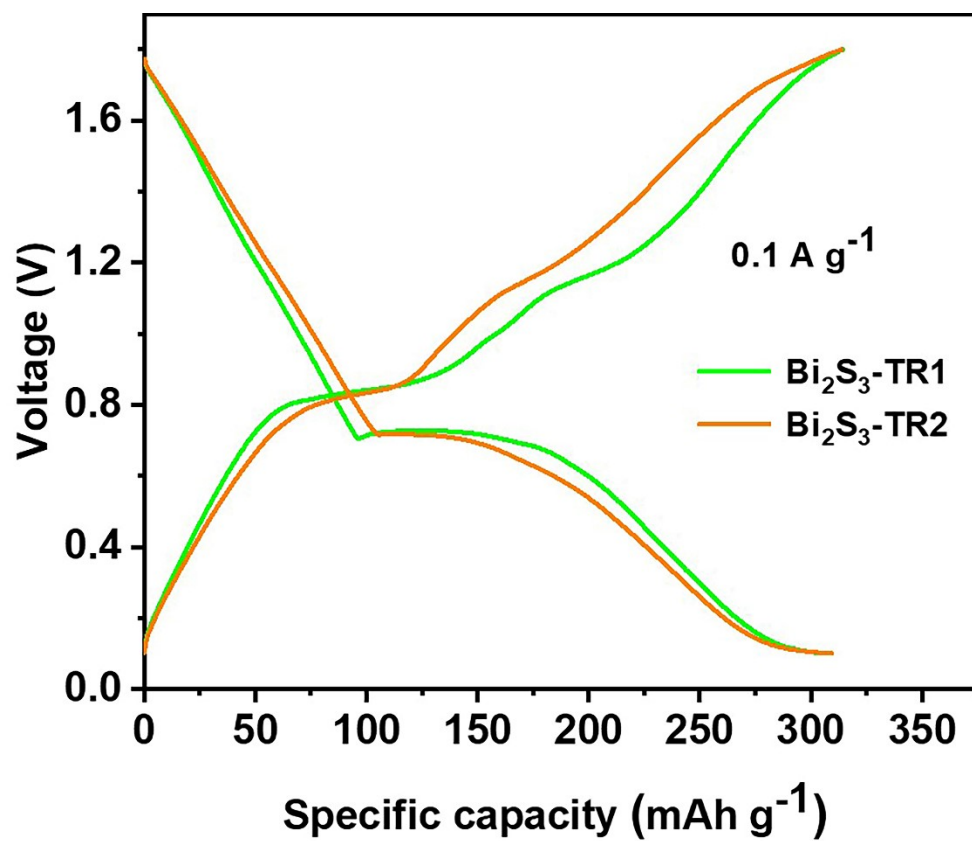

**Figure S6.** Discharge-charge profile of the Bi<sub>2</sub>S<sub>3</sub>-TR1 and Bi<sub>2</sub>S<sub>3</sub>-TR2 electrodes at a current density of 0.1 A g<sup>-1</sup>.

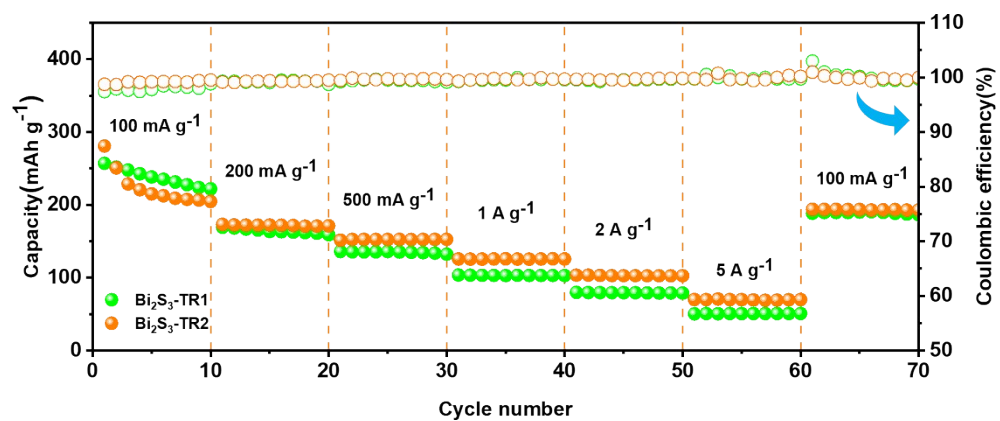

**Figure S7.** Rate capability at 0.1-5  $\text{A g}^{-1}$  of  $\text{Bi}_2\text{S}_3\text{-TR1}$  and  $\text{Bi}_2\text{S}_3\text{-TR2}$

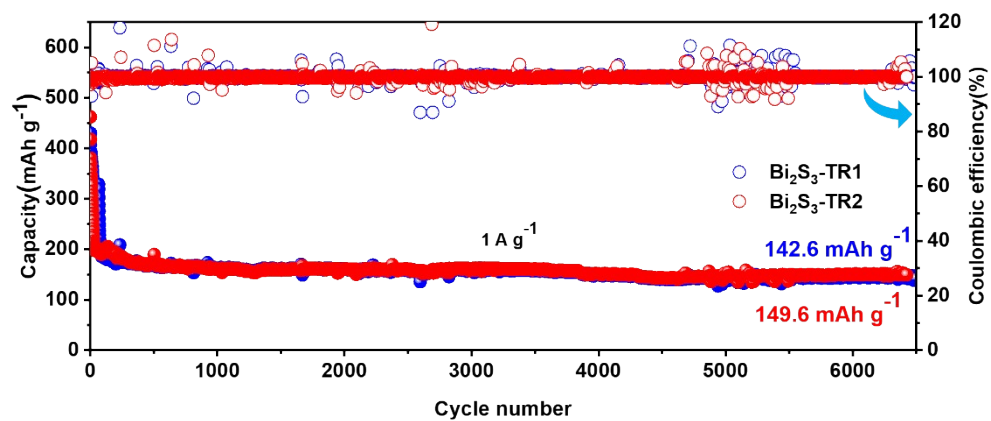

**Figure S8.** Long-term cycling stability at  $1 \text{ A g}^{-1}$  of  $\text{Bi}_2\text{S}_3\text{-TR1}$  and  $\text{Bi}_2\text{S}_3\text{-TR2}$ .

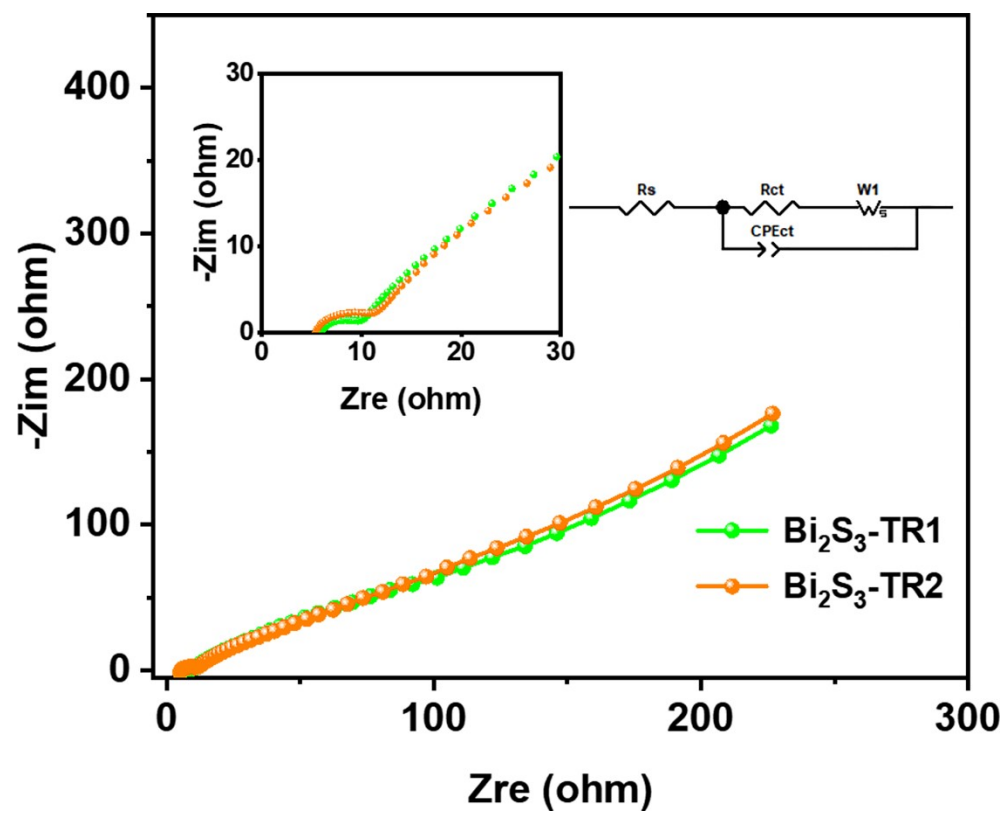

**Figure S9.** Nyquist plots of  $\text{Bi}_2\text{S}_3\text{-TR1}$  and  $\text{Bi}_2\text{S}_3\text{-TR2}$  electrode.

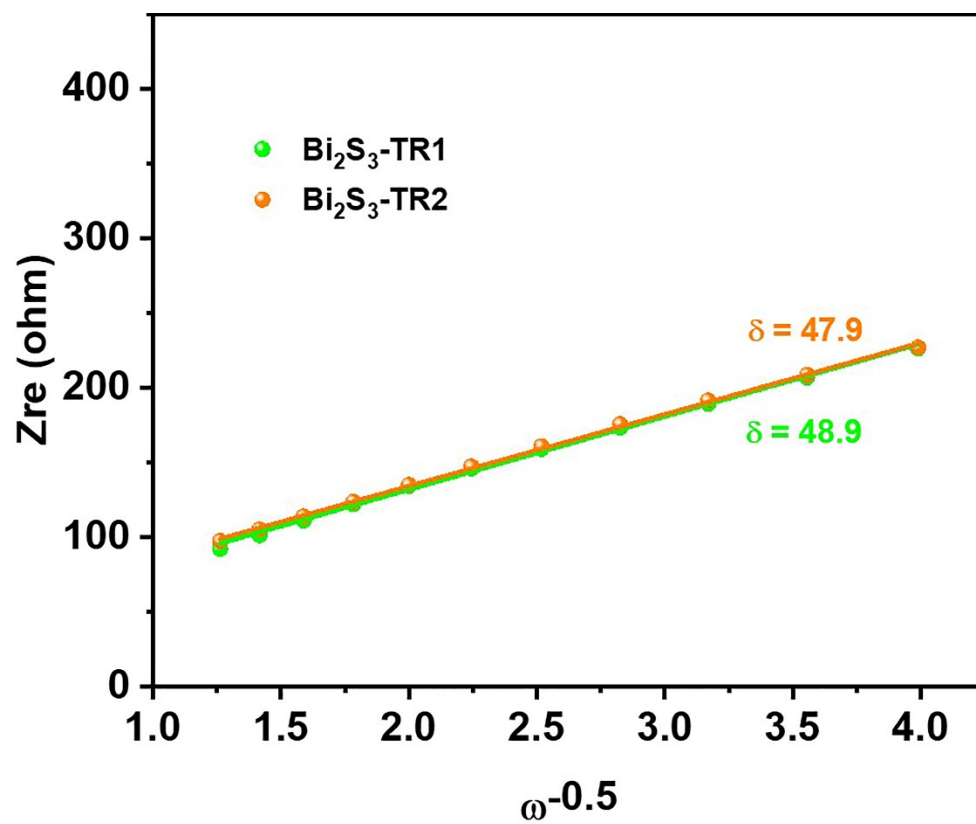

**Figure S10.** The plots of real parts of the complex impedance versus  $\omega^{-0.5}$ .

**Table S1.** EIS data statistics of Bi<sub>2</sub>S<sub>3</sub> electrode

| Sample                              | R <sub>s</sub> (Ω) | R <sub>ct</sub> (Ω) | σ    | D           |
|-------------------------------------|--------------------|---------------------|------|-------------|
| Bi <sub>2</sub> S <sub>3</sub> -TH  | 3.45               | 5.47                | 26.5 | 1.13168E-10 |
| Bi <sub>2</sub> S <sub>3</sub> -TF  | 2.58               | 16.79               | 82.6 | 1.16481E-11 |
| Bi <sub>2</sub> S <sub>3</sub> -TR1 | 5.66               | 5.98                | 48.9 | 3.32351E-11 |
| Bi <sub>2</sub> S <sub>3</sub> -TR2 | 5.07               | 7.08                | 47.9 | 3.46373E-11 |
